# Supplementary material
Source: publisher figshare collection journal article supplement (https://future-science-group.figshare.com/ndownloader/files/30833515)
Supplement: Supplementary file 1 [file 30833515]

**Supplementary Table of Primary Brain Tumor Patients admitted to the Intensive Care Unit**

| Characteristics | n=59 |
| --- | --- |
| Histologic Grade (%) |  |
| I | 4 (6.8) |
| II | 16 (27.1) |
| III | 9 (15.3) |
| IV | 27 (45.8) |
| Not applicable1 | 2 (3.4) |
| Unknown2 | 1 (1.7) |
| Disease Site (%) |  |
| Frontal lobe | 22 (37.2) |
| Temporal lobe | 11 (18.6) |
| Parietal lobe | 9 (15.3) |
| Multiple3 | 10 (17.0) |
| Other | 4 (6.8) |
| Extent of surgery (%) |  |
| Gross total resection | 40 (67.8) |
| Subtotal resection | 7 (11.9) |
| Biopsy | 11 (18.6) |
| No surgery | 1 (1.7) |
| Palliative care consult (%) | 12 (20.3) |
| DNAR prior to discharge4 | 22 (37.3) |
| Comfort measures only prior to discharge | 20 (33.9) |

1patients with primary CNS lymphoma, 2diagnosis assumed to be low-grade based on cold PET scan, 3single lesion involves multiple lobes of the brain or multifocal lesions, 4DNAR do not attempt resuscitation
